# Supplementary material for: Differences in Faecal Microbiome Taxonomy, Diversity and Functional Potential in a Bovine Cohort Experimentally Challenged with Mycobacterium avium subsp. paratuberculosis (MAP)
Source: MDPI journal article supplement (doi:10.3390/ani13101652), 2023-05-16
Supplement: s1 [file s1]

## Supplementary

**Table S1.** LDA scores and *p*-values associated for species in each group across time.

| Species                                | Time Point | Group       | LDA      | <i>p</i> -Value |
|----------------------------------------|------------|-------------|----------|-----------------|
| <i>Bifidobacterium pseudolongum</i>    | Month 3    | Neg_Control | 4.962739 | 0.011948        |
| <i>Methanobrevibacter unclassified</i> | Month 3    | Infected    | 4.886258 | 0.000113        |
| <i>Butyrivibrio unclassified</i>       | Month 3    | Infected    | 4.777852 | 0.00039         |
| <i>Alistipes shahii</i>                | Month 3    | Neg_Control | 4.478157 | 3.15E-08        |
| <i>Parabacteroides distasonis</i>      | Month 3    | Neg_Control | 4.346065 | 0.00015         |
| <i>Bifidobacterium angulatum</i>       | Month 3    | Infected    | 4.33015  | 0.002528        |
| <i>Prevotella stercorea</i>            | Month 3    | Neg_Control | 4.134405 | 0.000184        |
| <i>Bacteroides vulgatus</i>            | Month 3    | Neg_Control | 4.097004 | 0.015093        |
| <i>Subdoligranulum unclassified</i>    | Month 3    | Neg_Control | 4.093583 | 0.030568        |
| <i>Alistipes unclassified</i>          | Month 3    | Neg_Control | 4.076705 | 0.011057        |
| <i>Bifidobacterium adolescentis</i>    | Month 3    | Infected    | 4.071279 | 0.000218        |
| <i>Bifidobacterium pseudolongum</i>    | Month 6    | Neg_Control | 5.08208  | 3.44E-07        |
| <i>Methanobrevibacter unclassified</i> | Month 6    | Infected    | 4.946584 | 0.025121        |
| <i>Butyrivibrio unclassified</i>       | Month 6    | Infected    | 4.933534 | 0.005116        |
| <i>Butyrivibrio unclassified</i>       | Month 9    | Infected    | 4.656766 | 0.046088        |
| <i>Lactobacillus buchneri</i>          | Month 9    | Neg_Control | 4.651226 | 0.016779        |

**Table S2.** PERMANOVA and betadisper analysis for microbial community.

| PERMANOVA                                      |                |                 | Betadisper                                     |                 |
|------------------------------------------------|----------------|-----------------|------------------------------------------------|-----------------|
|                                                | R <sup>2</sup> | <i>p</i> -value |                                                | <i>p</i> -value |
| Exposed vs. Control                            | 0.05509        | 0.001           | Exposed vs. Control                            | 0.00516         |
| Sero-positive vs. Sero-negative                | 0.01083        | 0.05            | Sero-positive vs. sero-negative                | 0.03714         |
| Month 3 vs. Month 6 vs. Month 9                | 0.23819        | 0.001           | Month 3 vs. Month 6                            | 0.001           |
|                                                |                |                 | Month 3 vs. Month 9                            | 0.001           |
|                                                |                |                 | Month 6 vs. Month 9                            | 0.857           |
| Ileocecal valve enlargement present vs. absent | 0.0065         | 0.207           | Ileocecal valve enlargement present vs. absent | 0.34892         |

**Table S3.** Superfocus level 1.

| Pathway Level 1                                            | Time Point | Group       | LDA          | p-Value  |
|------------------------------------------------------------|------------|-------------|--------------|----------|
| Membrane Transport                                         | Month 3    | Neg_Control | 3.33315<br>4 | 6.36E-06 |
| Cofactors, Vitamins, Prosthetic Groups, Pigments           | Month 3    | Infected    | 2.82187<br>2 | 0.022913 |
| Phages, Prophages, Transposable elements Plasmids          | Month 3    | Neg_Control | 2.74275<br>4 | 0.000169 |
| Clustering based subsystems                                | Month 3    | Infected    | 2.69593<br>1 | 0.001186 |
| Potassium metabolism                                       | Month 3    | Neg_Control | 2.68032      | 7.54E-05 |
| RNA Metabolism                                             | Month 3    | Infected    | 2.65086<br>3 | 0.019879 |
| Virulence                                                  | Month 3    | Neg_Control | 2.64941<br>3 | 0.001114 |
| Stress Response                                            | Month 3    | Infected    | 2.58610<br>5 | 0.00846  |
| Respiration                                                | Month 3    | Infected    | 2.57890<br>4 | 0.025152 |
| Miscellaneous                                              | Month 3    | Infected    | 2.57625      | 0.04115  |
| Predictions based on plant prokaryote comparative analysis | Month 3    | Infected    | 2.47444<br>8 | 0.015598 |
| Phages, Prophages Transposable elements                    | Month 3    | Neg_Control | 2.41896<br>7 | 0.007609 |
| Iron acquisition and metabolism                            | Month 3    | Neg_Control | 2.38718<br>6 | 0.022913 |
| Sulfur Metabolism                                          | Month 3    | Infected    | 2.36710<br>2 | 0.046781 |
| Virulence, Disease and Defense                             | Month 3    | Neg_Control | 2.35646<br>2 | 0.014847 |
| Regulation and Cell signaling                              | Month 3    | Neg_Control | 2.24122<br>6 | 0.01278  |
| Carbohydrates                                              | Month 6    | Neg_Control | 4.72467<br>5 | 0.006332 |
| Protein Metabolism                                         | Month 6    | Infected    | 4.65829      | 9.88E-05 |
| Cofactors, Vitamins, Prosthetic Groups, Pigments           | Month 6    | Infected    | 4.33813<br>4 | 0.018525 |
| Nucleosides and Nucleotides                                | Month 6    | Neg_Control | 4.28415<br>9 | 1.28E-05 |
| RNA Metabolism                                             | Month 6    | Infected    | 4.26824<br>4 | 1.70E-05 |
| Respiration                                                | Month 6    | Infected    | 4.10926<br>1 | 0.003931 |
| Fatty Acids Lipids and Isoprenoids                         | Month 6    | Neg_Control | 3.75605<br>5 | 0.0202   |
| Phosphorus Metabolism                                      | Month 6    | Neg_Control | 3.66710<br>3 | 2.41E-07 |

|                                                    |         |             |          |          |
|----------------------------------------------------|---------|-------------|----------|----------|
| Phages, Prophages, Transposable elements, Plasmids | Month 6 | Infected    | 3.521126 | 0.001005 |
| Motility and Chemotaxis                            | Month 6 | Neg_Control | 3.313241 | 3.19E-05 |
| Iron acquisition and metabolism                    | Month 6 | Neg_Control | 3.312705 | 0.001713 |
| Nitrogen Metabolism                                | Month 6 | Neg_Control | 3.312471 | 5.45E-08 |
| Virulence, Disease and Defense                     | Month 6 | Neg_Control | 2.972411 | 0.000673 |
| Metabolism of Aromatic Compounds                   | Month 6 | Neg_Control | 2.808811 | 0.015362 |
| Metabolism of Aromatic Compounds                   | Month 9 | Infected    | 2.012456 | 0.00512  |
| Phosphorus Metabolism                              | Month 9 | Neg_Control | 2.30226  | 0.027486 |
| Nucleosides and Nucleotides                        | Month 9 | Neg_Control | 2.405557 | 0.025121 |
| Cell Wall and Capsule                              | Month 9 | Neg_Control | 2.457733 | 0.027486 |
| Motility and Chemotaxis                            | Month 9 | Neg_Control | 2.67589  | 6.16E-05 |

**Table S4.** Level 3 Pathways.

| Pathway                                | Timepoint | Group       | LDA      | <i>p</i> Value |
|----------------------------------------|-----------|-------------|----------|----------------|
| Ton and Tol transport systems          | Month 3   | Neg_Control | 3.397796 | 6.37E-07       |
| Cellulosome                            | Month 3   | Neg_Control | 2.852431 | 2.07E-06       |
| Conjugative transposon                 | Month 3   | Neg_Control | 2.765266 | 1.05E-05       |
| Bacteroidales                          |           |             |          |                |
| Mannose Metabolism                     | Month 3   | Neg_Control | 2.725044 | 2.47E-06       |
| DNA replication                        | Month 3   | Neg_Control | 2.496932 | 0.000711       |
| Multidrug Resistance Efflux            | Month 3   | Neg_Control | 2.462527 | 0.000109       |
| Pumps                                  |           |             |          |                |
| Peptidoglycan Biosynthesis             | Month 3   | Neg_Control | 2.442976 | 0.000258       |
| Translation elongation factor G family | Month 3   | Neg_Control | 2.423262 | 2.81E-08       |

|                                                                    |         |             |          |          |
|--------------------------------------------------------------------|---------|-------------|----------|----------|
| <b>Maltose and Maltodextrin Utilization</b>                        | Month 3 | Infected    | 2.346961 | 0.027579 |
| <b>Hydrogenases</b>                                                | Month 3 | Infected    | 2.319713 | 0.04115  |
| <b>Aromatic amino acid interconversions with aryl acids</b>        | Month 3 | Infected    | 2.31549  | 0.000297 |
| <b>ABC transporter oligopeptide</b>                                | Month 3 | Infected    | 2.28926  | 0.018949 |
| <b>TC3_A_1_5_1_</b>                                                |         |             |          |          |
| <b>Glycogen metabolism</b>                                         | Month 3 | Infected    | 2.279149 | 0.048796 |
| <b>Glutamine, Glutamate, Aspartate and Asparagine Biosynthesis</b> | Month 3 | Neg_Control | 2.260514 | 0.008917 |
| <b>RNA polymerase bacterial</b>                                    | Month 3 | Infected    | 2.24884  | 0.013439 |
| <b>Universal GTPases</b>                                           | Month 3 | Infected    | 2.245888 | 0.00492  |
| <b>Ribosome LSU bacterial</b>                                      | Month 3 | Infected    | 2.245667 | 0.025152 |
| <b>Formate hydrogenase</b>                                         | Month 3 | Infected    | 2.241678 | 0.002063 |
| <b>Potassium homeostasis</b>                                       | Month 3 | Neg_Control | 2.224955 | 8.12E-05 |
| <b>Histidine Degradation</b>                                       | Month 3 | Neg_Control | 2.221785 | 0.02401  |
| <b>DNA Repair Base Excision</b>                                    | Month 3 | Infected    | 2.215552 | 8.19E-06 |
| <b>Glycolysis and Gluconeogenesis</b>                              | Month 3 | Infected    | 2.214637 | 0.001263 |
| <b>Branched Chain Amino Acid Biosynthesis</b>                      | Month 3 | Neg_Control | 2.206725 | 0.02401  |
| <b>Ammonia assimilation</b>                                        | Month 3 | Neg_Control | 2.189119 | 0.027579 |
| <b>Single copy ribosomal proteins</b>                              | Month 3 | Infected    | 2.187243 | 0.002191 |
| <b>Fructooligosaccharides FOS and Raffinose Utilization</b>        | Month 3 | Infected    | 2.175969 | 0.014847 |

|                                                        |         |             |          |          |
|--------------------------------------------------------|---------|-------------|----------|----------|
| <b>Restriction Modification System</b>                 | Month 3 | Neg_Control | 2.173854 | 0.00492  |
| <b>Competence or DNA damage</b>                        | Month 3 | Infected    | 2.168221 | 0.000169 |
| inducible protein CinA and related protein families    |         |             |          |          |
| <b>Cobalt, zinc, cadmium resistance</b>                | Month 3 | Neg_Control | 2.147468 | 2.77E-05 |
| <b>Multi drug Resistance, Tripartite</b>               | Month 3 | Neg_Control | 2.14152  | 3.64E-07 |
| Systems Found in Gram Negative Bacteria                |         |             |          |          |
| <b>tRNA mods Archaea</b>                               | Month 3 | Infected    | 2.133358 | 0.003307 |
| <b>DNA topoisomerases Type II ATP dependent</b>        | Month 3 | Infected    | 2.130945 | 0.000195 |
| <b>CBSS_350688_3_peg_1509</b>                          | Month 3 | Infected    | 2.129998 | 0.030204 |
| <b>DNA repair bacterial UvrD and related helicases</b> | Month 3 | Infected    | 2.126481 | 3.99E-07 |
| <b>Fatty Acid Biosynthesis FASII</b>                   | Month 3 | Neg_Control | 2.12425  | 0.013439 |
| <b>Translation termination factors bacterial</b>       | Month 3 | Infected    | 2.122664 | 0.000277 |
| <b>Respiratory dehydrogenases 1</b>                    | Month 3 | Neg_Control | 2.105421 | 0.000809 |
| <b>Resistance to fluoroquinolones</b>                  | Month 3 | Infected    | 2.102699 | 0.001114 |
| <b>DNA repair bacterial</b>                            | Month 3 | Infected    | 2.09602  | 0.001618 |
| <b>DNA repair UvrABC system</b>                        | Month 3 | Infected    | 2.092834 | 0.001522 |
| <b>At5g37530_CsdL protein family</b>                   | Month 3 | Infected    | 2.08672  | 0.002777 |

|                                                                                                                    |         |             |          |          |
|--------------------------------------------------------------------------------------------------------------------|---------|-------------|----------|----------|
| <b>Two cell division clusters</b>                                                                                  | Month 3 | Infected    | 2.070994 | 0.016383 |
| relating to chromosome<br>partitioning                                                                             |         |             |          |          |
| <b>GroupII intron associated genes</b>                                                                             | Month 3 | Neg_Control | 2.070567 | 0.000711 |
| <b>At5g63290</b>                                                                                                   | Month 3 | Infected    | 2.069919 | 0.005201 |
| <b>Heatshock dnaK gene cluster</b>                                                                                 | Month 3 | Infected    | 2.036021 | 0.006835 |
| extended                                                                                                           |         |             |          |          |
| <b>EC3_4_11__Aminopeptidases</b>                                                                                   | Month 3 | Neg_Control | 2.02731  | 0.001114 |
| <b>Na translocating NADH quinone<br/>oxidoreductase and rnf_like<br/>group of electron transport<br/>complexes</b> | Month 9 | Neg_Control | 2.339701 | 0.001069 |
| <b>Maltose and Maltodextrin<br/>Utilization</b>                                                                    | Month 9 | Neg_Control | 2.28345  | 0.001636 |
| <b>Glycogen metabolism</b>                                                                                         | Month 9 | Neg_Control | 2.236263 | 0.020915 |
| <b>Carbon monoxide induced<br/>hydrogenase</b>                                                                     | Month 9 | Neg_Control | 2.234515 | 0.003289 |
| <b>Phosphate metabolism</b>                                                                                        | Month 9 | Neg_Control | 2.227462 | 0.004849 |
| <b>Flagellum</b>                                                                                                   | Month 9 | Neg_Control | 2.207519 | 2.89E-05 |
| <b>Multidrug Resistance Efflux<br/>Pumps</b>                                                                       | Month 9 | Neg_Control | 2.182279 | 0.015757 |
| <b>Flagellar motility</b>                                                                                          | Month 9 | Neg_Control | 2.15775  | 1.26E-06 |
| <b>CBSS_393121_3_peg_2760</b>                                                                                      | Month 9 | Neg_Control | 2.145124 | 0.001285 |
| <b>Inositol catabolism</b>                                                                                         | Month 9 | Infected    | 2.142067 | 0.000437 |
| <b>DeNovo Purine Biosynthesis</b>                                                                                  | Month 9 | Neg_Control | 2.140344 | 0.001137 |
| <b>Lactose and Galactose Uptake<br/>and Utilization</b>                                                            | Month 9 | Neg_Control | 2.121676 | 0.010635 |
| <b>Restriction Modification System</b>                                                                             | Month 9 | Neg_Control | 2.089932 | 0.015757 |
| <b>Copper homeostasis</b>                                                                                          | Month 9 | Infected    | 2.086014 | 0.000645 |
| <b>Omega_amidaseKE2</b>                                                                                            | Month 9 | Neg_Control | 2.073458 | 0.000944 |
| <b>Translation elongation factor G<br/>family</b>                                                                  | Month 9 | Neg_Control | 2.067573 | 0.000208 |
| <b>Lacto N BioseI and<br/>Galacto_N_Biose Metabolic<br/>Pathway</b>                                                | Month 9 | Neg_Control | 2.041006 | 0.000467 |
| <b>Methionine Biosynthesis</b>                                                                                     | Month 9 | Infected    | 2.03467  | 0.000103 |
| <b>Ni Fehydrogenase maturation</b>                                                                                 | Month 9 | Infected    | 2.01025  | 0.003108 |
| <b>Xylose utilization</b>                                                                                          | Month 9 | Neg_Control | 2.004691 | 0.032797 |

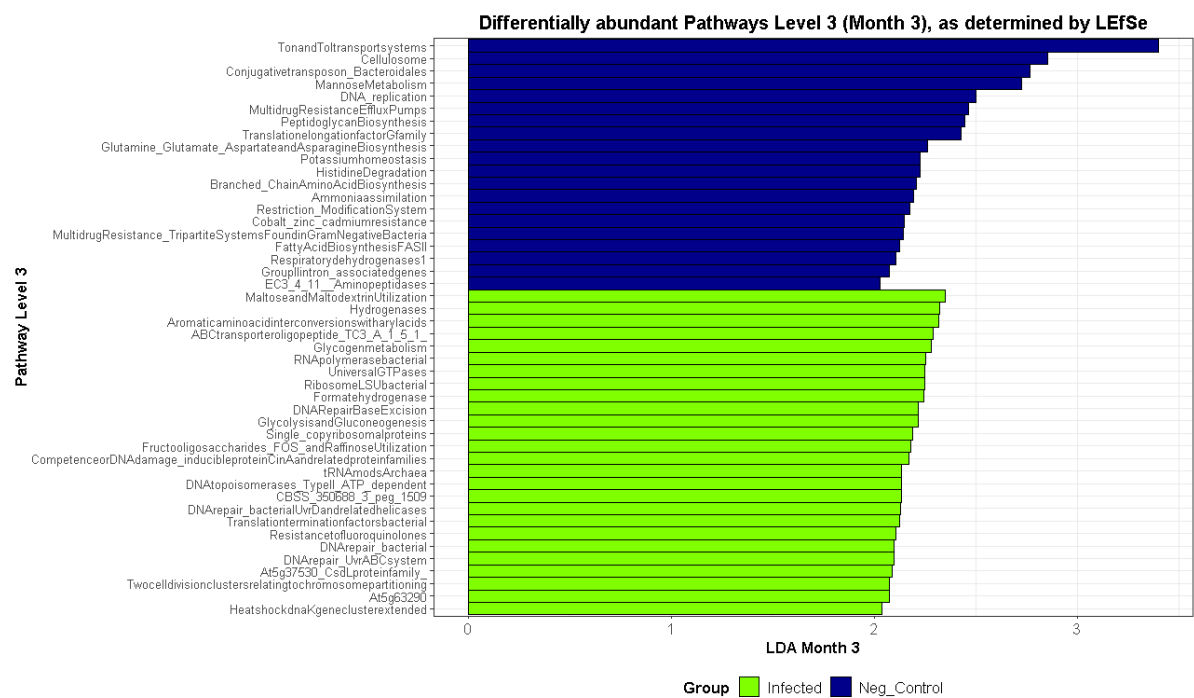

**Figure S1.** LefSe analysis of Level 3 SUPER-FOCUS pathways in month 3.

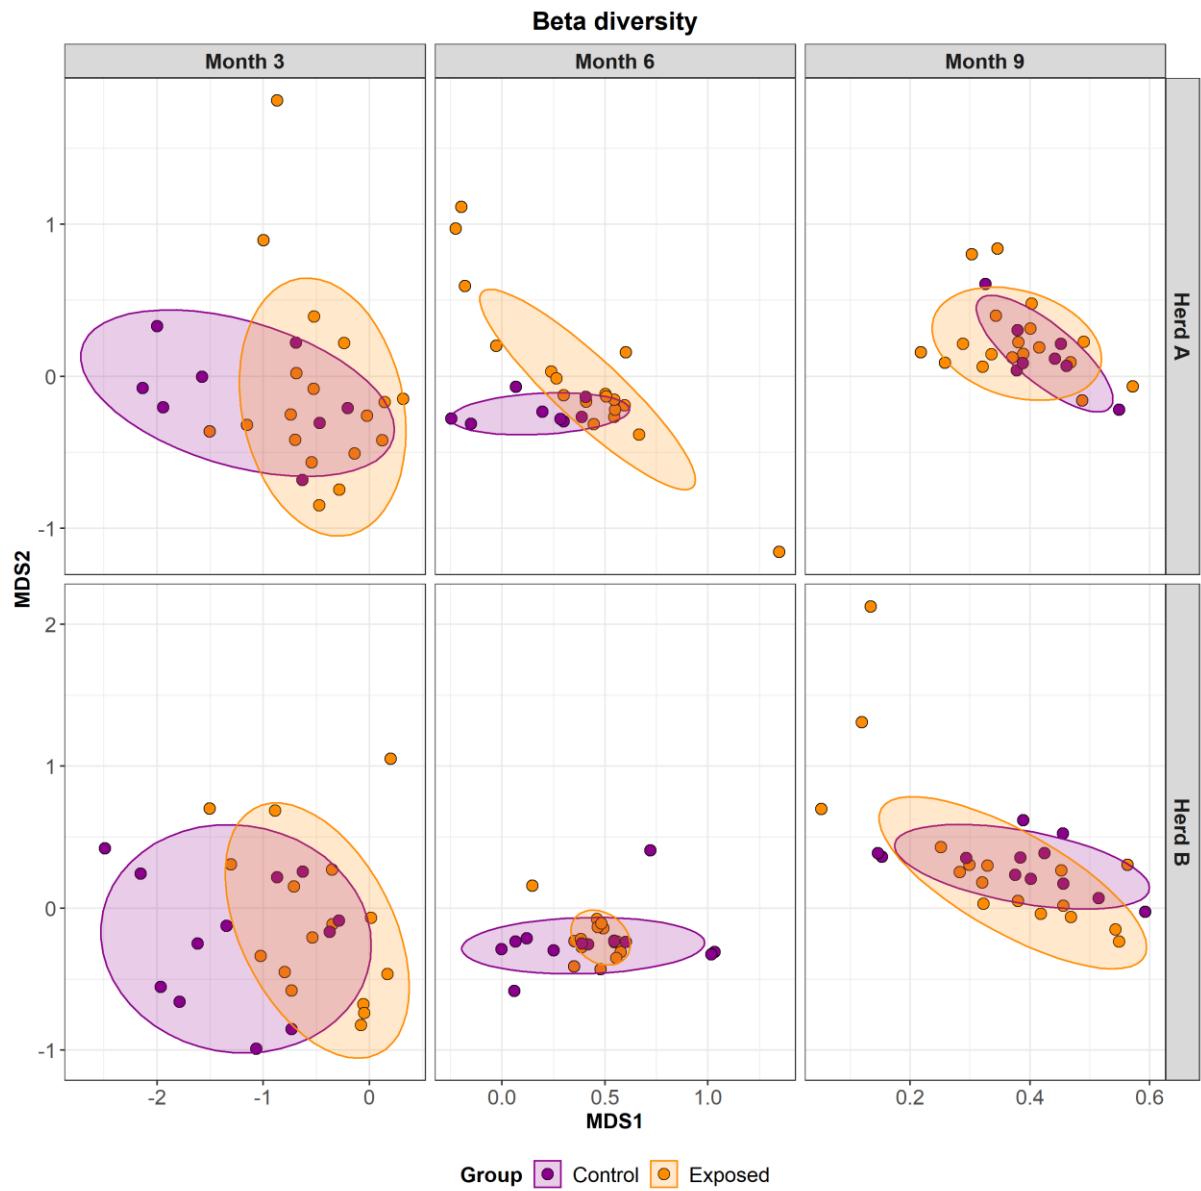

**Figure S2.** Bray-Curtis beta diversity among animals in both the exposed and control groups, across both time and herd. Month 6 shows the microbiome becoming more stable in herd B, where samples in the exposed group are most similar. However, results were non-significant.

**Table S5.** A summary of the positive and inconclusive IDEX ELISA results during the course of the experimental challenge study, with S/P% provided. Animals which remained negative are not included. This table has been adapted from Britton, 2017.

| Group      | ID   | Pre | M3 | M6 | M10       | M12 | M15 | M16       | M20       | M21       | M24       | M27       | M28        | M30       | M31       | M33       |
|------------|------|-----|----|----|-----------|-----|-----|-----------|-----------|-----------|-----------|-----------|------------|-----------|-----------|-----------|
| Challenged | 2155 | -   | -  | -  | -         | -   | -   | √<br>68.3 | √<br>95.0 | √<br>55.6 | √<br>82.6 | √<br>86.9 | √<br>109.4 | -         | -         | -         |
|            | 2176 | -   | -  | -  | -         | -   | -   | -         | √<br>56.8 | -         | I<br>52.5 | -         | -          | -         | -         | -         |
|            | 2194 | -   | -  | -  | -         | -   | -   | I<br>50.2 | -         | I<br>51.4 | √<br>60.7 | -         | I<br>48.7  | -         | I<br>49.2 | -         |
|            | 2199 | -   | -  | -  | -         | -   | -   | -         | √<br>61.6 | I<br>50.2 | -         |           |            |           |           |           |
|            | 2201 | -   | -  | -  | -         | -   | -   | -         | I<br>48.4 | -         | -         | -         | -          | -         | -         | -         |
|            | 2390 | -   | -  | -  | -         | -   | -   | -         | √<br>63.0 | √<br>63.0 | -         | √<br>64.8 | √<br>67.6  | I<br>50.4 | -         | -         |
|            | 2402 | -   | -  | -  | -         | -   | -   | √<br>93.9 | √<br>84.9 | √<br>68.7 | -         | √<br>84.8 | √<br>99.0  | √<br>70.8 | -         | -         |
|            | 2413 | -   | -  | -  | -         | -   | -   | -         | -         | -         | -         | -         | I<br>45.3  | -         | -         | -         |
|            | 2415 | -   | -  | -  | -         | -   | -   | -         | I<br>50.0 | -         | -         | -         | -          | -         | -         | -         |
|            | 2420 | -   | -  | -  | -         | -   | -   | -         | √<br>68.1 | √<br>76.1 | √<br>70.8 | √<br>67.2 | √<br>85.2  | √<br>56.8 | -         | √<br>81.8 |
| Control    | 2170 | -   | -  | -  | √<br>56.2 | -   |     |           |           |           |           |           |            |           |           |           |
|            | 2454 | -   | -  | -  | -         | -   | -   | -         | -         | -         | √<br>93.4 | √<br>78.3 | √<br>82.5  | √<br>68   | √<br>64.8 | √<br>79.8 |

Pre = preimmune testing; M = month post-challenge; √ = Positive, - = Negative; I = Inconclusive. Blacked out cells represent animals that were necropsied during the previous timepoint.

**Table S6.** IGRA PPDj  $\Delta$ OD readings from animals at 3 months post inoculation.

| Group      | ID   | PPDj  |  | ID   | PPDj  |  | ID   | PPDj   |
|------------|------|-------|--|------|-------|--|------|--------|
| Challenged | 2149 | 0.369 |  | 2194 | 0.195 |  | 2403 | 0.012  |
|            | 2152 | 2.947 |  | 2199 | 0.024 |  | 2404 | 0.315  |
|            | 2154 | 1.817 |  | 2200 | 0.202 |  | 2407 | 0.161  |
|            | 2155 | 0.005 |  | 2201 | 1.240 |  | 2408 | 0.439  |
|            | 2158 | 0.248 |  | 2209 | 0.165 |  | 2410 | 0.116  |
|            | 2162 | 0.115 |  | 2212 | 0.307 |  | 2412 | 0.193  |
|            | 2164 | 0.087 |  | 2387 | 0.183 |  | 2413 | 0.051  |
|            | 2169 | 0.141 |  | 2388 | 1.898 |  | 2415 | 0.148  |
|            | 2176 | 0.222 |  | 2390 | 0.973 |  | 2416 | 0.204  |
|            | 2182 | 0.512 |  | 2392 | 0.121 |  | 2420 | 0.411  |
|            | 2183 | 0.072 |  | 2393 | 1.635 |  | 2422 | 0.140  |
|            | 2185 | 0.061 |  | 2402 | 0.220 |  |      |        |
|            | ID   | PPDj  |  | ID   | PPDj  |  | ID   | PPDj   |
| Control    | 2163 | 0.254 |  | 2218 | 0.011 |  | 2401 | -0.010 |
|            | 2168 | 2.636 |  | 2389 | 0.166 |  | 2405 | 0.681  |
|            | 2170 | 0.022 |  | 2391 | 0.019 |  | 2406 | 0.398  |
|            | 2172 | 0.148 |  | 2395 | 1.203 |  | 2409 | 0.062  |
|            | 2175 | 0.324 |  | 2397 | 0.068 |  | 2425 | 0.191  |
|            | 2213 | 1.377 |  | 2398 | 0.129 |  | 2454 | 0.771  |
|            | 2215 | 0.212 |  | 2399 | 0.646 |  |      |        |
